# Supplementary material for: Spatial imaging of the spin Hall effect and current-induced polarization in two-dimensional electron gases
Source: Springer Nature journal article supplement (doi:10.1038/nphys009), 2005-09-29
Supplement: nphys009-s1.pdf [file nphys009-s1.pdf]

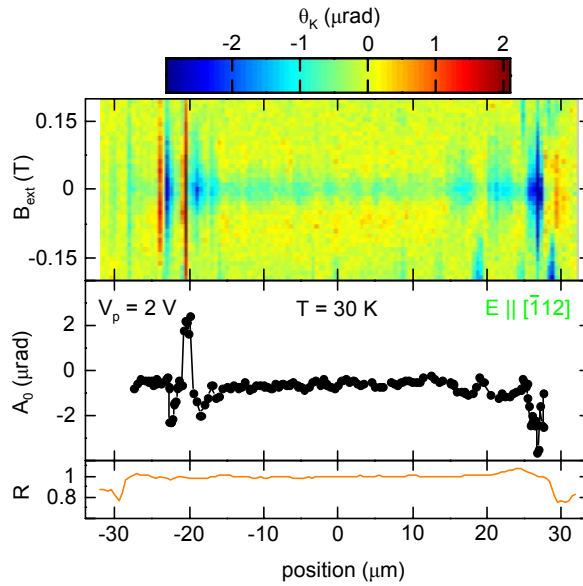

**Supplementary Figure 1.** Spin polarization across a channel oriented along  $[\bar{1}12]$ .

$B_{\text{ext}}$  scans as a function of position near the edges of the channel of a device

fabricated along  $[\bar{1}12]$  with  $w = 60 \mu\text{m}$  and  $l = 306 \mu\text{m}$  for  $V_p = 2 \text{ V}$ . Amplitude  $A_0$

and reflectivity  $R$  are also plotted.
